# Supplementary material for: Integrated glycomics and genetics analyses reveal a potential role for N-glycosylation of plasma proteins and IgGs, as well as the complement system, in the development of type 1 diabetes
Source: PubMed Central journal article supplement (PMC10163086; doi:10.1007/s00125-023-05881-z), 2023-03-13
Supplement: 125_2023_5881_MOESM1_ESM.pdf [file 125_2023_5881_MOESM1_ESM.pdf]

**ESM Table 1.** Selected SNPs used in the validation cohort for genotyping

| Candidate gene | Chr | SNP       | OA, MA | BP        | Associated glycan                                   |
|----------------|-----|-----------|--------|-----------|-----------------------------------------------------|
| <i>MGAT5</i>   | 2   | rs2460382 | A, G   | 135014116 | GP29                                                |
| <i>ST6GAL1</i> | 3   | rs3872724 | G, A   | 186741221 | IGP16                                               |
| <i>ST6GAL1</i> | 3   | rs4686838 | A, G   | 186743053 | IGP16                                               |
| <i>C3</i>      | 19  | rs2230203 | C, A   | 6710782   | GP19                                                |
| <i>C3</i>      | 19  | rs1047286 | G, A   | 6713262   | GP19                                                |
| <i>MGAT3</i>   | 22  | rs137683  | G, C   | 39738501  | IGP10                                               |
| <i>MGAT3</i>   | 22  | rs137686  | G, C   | 39739638  | IGP10, IGP15                                        |
| <i>MGAT3</i>   | 22  | rs137690  | G, C   | 39742825  | IGP10, IGP15                                        |
| <i>MGAT3</i>   | 22  | rs9611156 | A, C   | 39743170  | IGP10, IGP15                                        |
| <i>MGAT3</i>   | 22  | rs137707  | G, A   | 39751401  | IGP10, IGP15                                        |
| <i>MGAT3</i>   | 22  | rs5757630 | A, C   | 39754433  | IGP10                                               |
| <i>MGAT3</i>   | 22  | rs2413588 | G, A   | 39755175  | IGP10                                               |
| <i>MGAT3</i>   | 22  | rs760742  | A, C   | 39755190  | IGP10                                               |
| <i>MGAT3</i>   | 22  | rs2413589 | G, A   | 39755689  | IGP10, IGP15                                        |
| <i>MGAT3</i>   | 22  | rs5757633 | G, A   | 39756270  | IGP10                                               |
| <i>MGAT3</i>   | 22  | rs4821887 | A, G   | 39756985  | IGP10, IGP15                                        |
| <i>MGAT3</i>   | 22  | rs1010169 | G, A   | 39778167  | IGP10, IGP11, IGP15                                 |
| <i>MGAT3</i>   | 22  | rs5757650 | G, A   | 39778419  | IGP10, IGP11, IGP15                                 |
| <i>MGAT3</i>   | 22  | rs5757678 | A, G   | 39843409  | GP6, IGP6, IGP10, IGP11, IGP15, IGP19, IGP23, IGP24 |
| <i>MGAT3</i>   | 22  | rs5757680 | G, A   | 39844793  | GP6, IGP6, IGP10, IGP11, IGP15, IGP19, IGP23, IGP24 |
| <i>MGAT3</i>   | 22  | rs137702  | G, A   | 39750158  | IGP10, IGP15                                        |

The results are reported for the GRCh Build 37, and alleles are aligned to the TOP strand.

Chr, chromosome; BP, position of a SNP on a chromosome in base-pairs; MA, minor allele; OA, other allele; *MGAT5*, alpha-1,6-mannosylglycoprotein 6-beta-N-acetylglucosaminyltransferase gene; *MGAT3*, beta-1,4-mannosyl-glycoprotein 4-beta-N-acetylglucosaminyltransferase gene; *C3*, complement C3 gene; *ST6GAL1*, ST6 beta-galactoside alpha-2,6-sialyltransferase 1 gene

**ESM Table 2.** CVs (%) of the measured N-glycans among standard and duplicated samples obtained previously (Rudman N, Kifer D, Kaur S et al (2022) Children at onset of type 1 diabetes show altered N-glycosylation of plasma proteins and IgG. *Diabetologia* 65(8):1315–1327)

| <b>Glycome</b> | <b>IgG</b> | <b>Plasma protein</b> |
|----------------|------------|-----------------------|
| GP1            | 13.90      | 4.59                  |
| GP2            | 8.98       | 2.01                  |
| GP3            | 22.60      | 12.10                 |
| GP4            | 3.48       | 3.68                  |
| GP5            | 15.66      | 4.86                  |
| GP6            | 3.08       | 3.87                  |
| GP7            | 9.51       | 3.03                  |
| GP8            | 1.45       | 7.98                  |
| GP9            | 2.59       | 12.76                 |
| GP10           | 3.62       | 3.11                  |
| GP11           | 7.12       | 5.02                  |
| GP12           | 10.15      | 4.92                  |
| GP13           | 11.24      | 13.04                 |
| GP14           | 2.78       | 3.22                  |
| GP15           | 5.62       | 15.06                 |
| GP16           | 3.11       | 2.59                  |
| GP17           | 5.89       | 5.07                  |
| GP18           | 3.08       | 2.53                  |
| GP19           | 5.43       | 3.37                  |
| GP20           | 12.61      | 2.60                  |
| GP21           | 12.00      | 3.51                  |
| GP22           | 16.46      | 2.93                  |
| GP23           | 5.09       | 5.54                  |
| GP24           | 6.36       | 4.64                  |
| GP25           |            | 22.82                 |
| GP26           |            | 4.42                  |

|      |       |
|------|-------|
| GP27 | 6.68  |
| GP28 | 4.57  |
| GP29 | 18.94 |
| GP30 | 3.86  |
| GP31 | 8.69  |
| GP32 | 5.96  |
| GP33 | 5.04  |
| GP34 | 7.05  |
| GP35 | 9.52  |
| GP36 | 7.25  |
| GP37 | 8.60  |
| GP38 | 6.00  |
| GP39 | 7.72  |

**ESM Table 3.** The complete list of genetic markers that reached significant genome-wide association ( $p < 2.4 \times 10^{-9}$ ) with IgG N-glycans in the discovery cohort

| Chr | Candidate gene | N    | Glycan | SNP       | $p$                    | OA, MA (MAF) | $\beta$ (SE)  | $R^2$ | T     | BP        |
|-----|----------------|------|--------|-----------|------------------------|--------------|---------------|-------|-------|-----------|
| 3   | <i>ST6GALI</i> | 1056 | IGP16  | rs3872724 | $1.81 \times 10^{-22}$ | G, A (0.37)  | -0.16 (0.016) | 0.09  | -9.98 | 186741221 |
| 3   | <i>ST6GALI</i> | 1056 | IGP16  | rs4686838 | $1.09 \times 10^{-15}$ | A, G (0.44)  | -0.13 (0.016) | 0.06  | -8.14 | 186743053 |
| 22  | <i>MGAT3</i>   | 1056 | IGP6   | rs5757678 | $1.57 \times 10^{-13}$ | A, G (0.27)  | 0.39 (0.052)  | 0.05  | 7.48  | 39843409  |
| 22  | <i>MGAT3</i>   | 1045 | IGP6   | rs5757680 | $2.03 \times 10^{-13}$ | G, A (0.26)  | 0.39 (0.053)  | 0.05  | 7.45  | 39844793  |
| 22  | <i>MGAT3</i>   | 1056 | IGP10  | rs1010169 | $6.39 \times 10^{-21}$ | G, A (0.34)  | 0.34 (0.036)  | 0.08  | 9.59  | 39778167  |
| 22  | <i>MGAT3</i>   | 1056 | IGP10  | rs137683  | $6.18 \times 10^{-10}$ | G, C (0.23)  | 0.26 (0.041)  | 0.04  | 6.24  | 39738501  |
| 22  | <i>MGAT3</i>   | 1052 | IGP10  | rs137686  | $5.30 \times 10^{-13}$ | G, C (0.25)  | 0.29 (0.04)   | 0.05  | 7.31  | 39739638  |
| 22  | <i>MGAT3</i>   | 1056 | IGP10  | rs137690  | $9.32 \times 10^{-13}$ | G, C (0.25)  | 0.29 (0.04)   | 0.05  | 7.23  | 39742825  |
| 22  | <i>MGAT3</i>   | 1048 | IGP10  | rs137702  | $5.95 \times 10^{-14}$ | G, A (0.24)  | 0.31 (0.041)  | 0.05  | 7.61  | 39750158  |
| 22  | <i>MGAT3</i>   | 1056 | IGP10  | rs137707  | $8.76 \times 10^{-14}$ | G, A (0.24)  | 0.31 (0.041)  | 0.05  | 7.56  | 39751401  |
| 22  | <i>MGAT3</i>   | 1036 | IGP10  | rs2413588 | $1.20 \times 10^{-10}$ | G, A (0.29)  | 0.25 (0.039)  | 0.04  | 6.51  | 39755175  |
| 22  | <i>MGAT3</i>   | 1056 | IGP10  | rs2413589 | $1.14 \times 10^{-13}$ | G, A (0.24)  | 0.31 (0.041)  | 0.05  | 7.52  | 39755689  |
| 22  | <i>MGAT3</i>   | 1056 | IGP10  | rs4821887 | $8.76 \times 10^{-14}$ | A, G (0.24)  | 0.31 (0.041)  | 0.05  | 7.56  | 39756985  |
| 22  | <i>MGAT3</i>   | 1056 | IGP10  | rs5757630 | $7.10 \times 10^{-10}$ | A, C (0.30)  | 0.24 (0.038)  | 0.04  | 6.22  | 39754433  |
| 22  | <i>MGAT3</i>   | 1056 | IGP10  | rs5757633 | $7.10 \times 10^{-10}$ | G, A (0.30)  | 0.24 (0.038)  | 0.04  | 6.22  | 39756270  |
| 22  | <i>MGAT3</i>   | 1056 | IGP10  | rs5757650 | $1.14 \times 10^{-20}$ | G, A (0.35)  | 0.34 (0.036)  | 0.08  | 9.52  | 39778419  |
| 22  | <i>MGAT3</i>   | 1056 | IGP10  | rs5757678 | $3.04 \times 10^{-26}$ | A, G (0.27)  | 0.41 (0.038)  | 0.1   | 10.89 | 39843409  |
| 22  | <i>MGAT3</i>   | 1045 | IGP10  | rs5757680 | $2.12 \times 10^{-26}$ | G, A (0.26)  | 0.41 (0.038)  | 0.1   | 10.93 | 39844793  |
| 22  | <i>MGAT3</i>   | 1056 | IGP10  | rs760742  | $7.10 \times 10^{-10}$ | A, C (0.30)  | 0.24 (0.038)  | 0.04  | 6.22  | 39755190  |
| 22  | <i>MGAT3</i>   | 1056 | IGP10  | rs9611156 | $5.09 \times 10^{-12}$ | A, C (0.25)  | 0.28 (0.04)   | 0.04  | 6.98  | 39743170  |
| 22  | <i>MGAT3</i>   | 1056 | IGP11  | rs1010169 | $2.82 \times 10^{-11}$ | G, A (0.34)  | 0.03 (0.004)  | 0.04  | 6.73  | 39778167  |
| 22  | <i>MGAT3</i>   | 1056 | IGP11  | rs5757650 | $7.00 \times 10^{-11}$ | G, A (0.35)  | 0.03 (0.004)  | 0.04  | 6.59  | 39778419  |
| 22  | <i>MGAT3</i>   | 1056 | IGP11  | rs5757678 | $3.40 \times 10^{-13}$ | A, G (0.27)  | 0.03 (0.005)  | 0.05  | 7.37  | 39843409  |
| 22  | <i>MGAT3</i>   | 1045 | IGP11  | rs5757680 | $1.63 \times 10^{-13}$ | G, A (0.26)  | 0.04 (0.005)  | 0.05  | 7.48  | 39844793  |
| 22  | <i>MGAT3</i>   | 1056 | IGP15  | rs1010169 | $1.51 \times 10^{-11}$ | G, A (0.34)  | 0.1 (0.014)   | 0.04  | 6.82  | 39778167  |
| 22  | <i>MGAT3</i>   | 1052 | IGP15  | rs137686  | $6.66 \times 10^{-10}$ | G, C (0.25)  | 0.1 (0.016)   | 0.04  | 6.23  | 39739638  |
| 22  | <i>MGAT3</i>   | 1056 | IGP15  | rs137690  | $6.07 \times 10^{-10}$ | G, C (0.25)  | 0.1 (0.016)   | 0.04  | 6.25  | 39742825  |
| 22  | <i>MGAT3</i>   | 1048 | IGP15  | rs137702  | $2.88 \times 10^{-10}$ | G, A (0.24)  | 0.1 (0.016)   | 0.04  | 6.37  | 39750158  |

|    |              |      |       |           |                        |             |               |      |       |          |
|----|--------------|------|-------|-----------|------------------------|-------------|---------------|------|-------|----------|
| 22 | <i>MGAT3</i> | 1056 | IGP15 | rs137707  | $3.66 \times 10^{-10}$ | G, A (0.24) | 0.1 (0.016)   | 0.04 | 6.33  | 39751401 |
| 22 | <i>MGAT3</i> | 1056 | IGP15 | rs2413589 | $5.36 \times 10^{-10}$ | G, A (0.24) | 0.1 (0.016)   | 0.04 | 6.27  | 39755689 |
| 22 | <i>MGAT3</i> | 1056 | IGP15 | rs4821887 | $3.66 \times 10^{-10}$ | A, G (0.24) | 0.1 (0.016)   | 0.04 | 6.33  | 39756985 |
| 22 | <i>MGAT3</i> | 1056 | IGP15 | rs5757650 | $3.60 \times 10^{-11}$ | G, A (0.35) | 0.09 (0.014)  | 0.04 | 6.69  | 39778419 |
| 22 | <i>MGAT3</i> | 1056 | IGP15 | rs5757678 | $3.98 \times 10^{-15}$ | A, G (0.27) | 0.12 (0.015)  | 0.06 | 7.97  | 39843409 |
| 22 | <i>MGAT3</i> | 1045 | IGP15 | rs5757680 | $1.04 \times 10^{-15}$ | G, A (0.26) | 0.12 (0.015)  | 0.06 | 8.15  | 39844793 |
| 22 | <i>MGAT3</i> | 1056 | IGP15 | rs9611156 | $9.50 \times 10^{-10}$ | A, C (0.25) | 0.1 (0.015)   | 0.03 | 6.17  | 39743170 |
| 22 | <i>MGAT3</i> | 1056 | IGP19 | rs5757678 | $2.69 \times 10^{-10}$ | A, G (0.27) | 0.1 (0.016)   | 0.04 | 6.38  | 39843409 |
| 22 | <i>MGAT3</i> | 1045 | IGP19 | rs5757680 | $1.38 \times 10^{-10}$ | G, A (0.26) | 0.1 (0.016)   | 0.04 | 6.48  | 39844793 |
| 22 | <i>MGAT3</i> | 1056 | IGP23 | rs5757678 | $6.16 \times 10^{-11}$ | A, G (0.27) | -0.19 (0.028) | 0.04 | -6.61 | 39843409 |
| 22 | <i>MGAT3</i> | 1045 | IGP23 | rs5757680 | $5.04 \times 10^{-11}$ | G, A (0.26) | -0.19 (0.028) | 0.04 | -6.64 | 39844793 |
| 22 | <i>MGAT3</i> | 1056 | IGP24 | rs5757678 | $1.00 \times 10^{-11}$ | A, G (0.27) | 0.12 (0.017)  | 0.04 | 6.88  | 39843409 |
| 22 | <i>MGAT3</i> | 1045 | IGP24 | rs5757680 | $7.65 \times 10^{-12}$ | G, A (0.26) | 0.12 (0.017)  | 0.04 | 6.92  | 39844793 |

The results are reported for the GRCh Build 37, and alleles are aligned to the TOP strand. The  $\beta$  coefficient is reported for the minor allele and expressed as the relative glycan abundance (%).

Chr, chromosome; N, sample size; MA, minor allele; OA, other allele; MAF, minor allele frequency;  $R^2$ , percentage of explained glycan variance; BP, position of a SNP on a chromosome in base-pairs; *ST6GALI*, ST6 beta-galactoside alpha-2,6-sialyltransferase 1 gene; *MGAT3*, beta-1,4-mannosyl-glycoprotein 4-beta-N-acetylglucosaminyltransferase gene

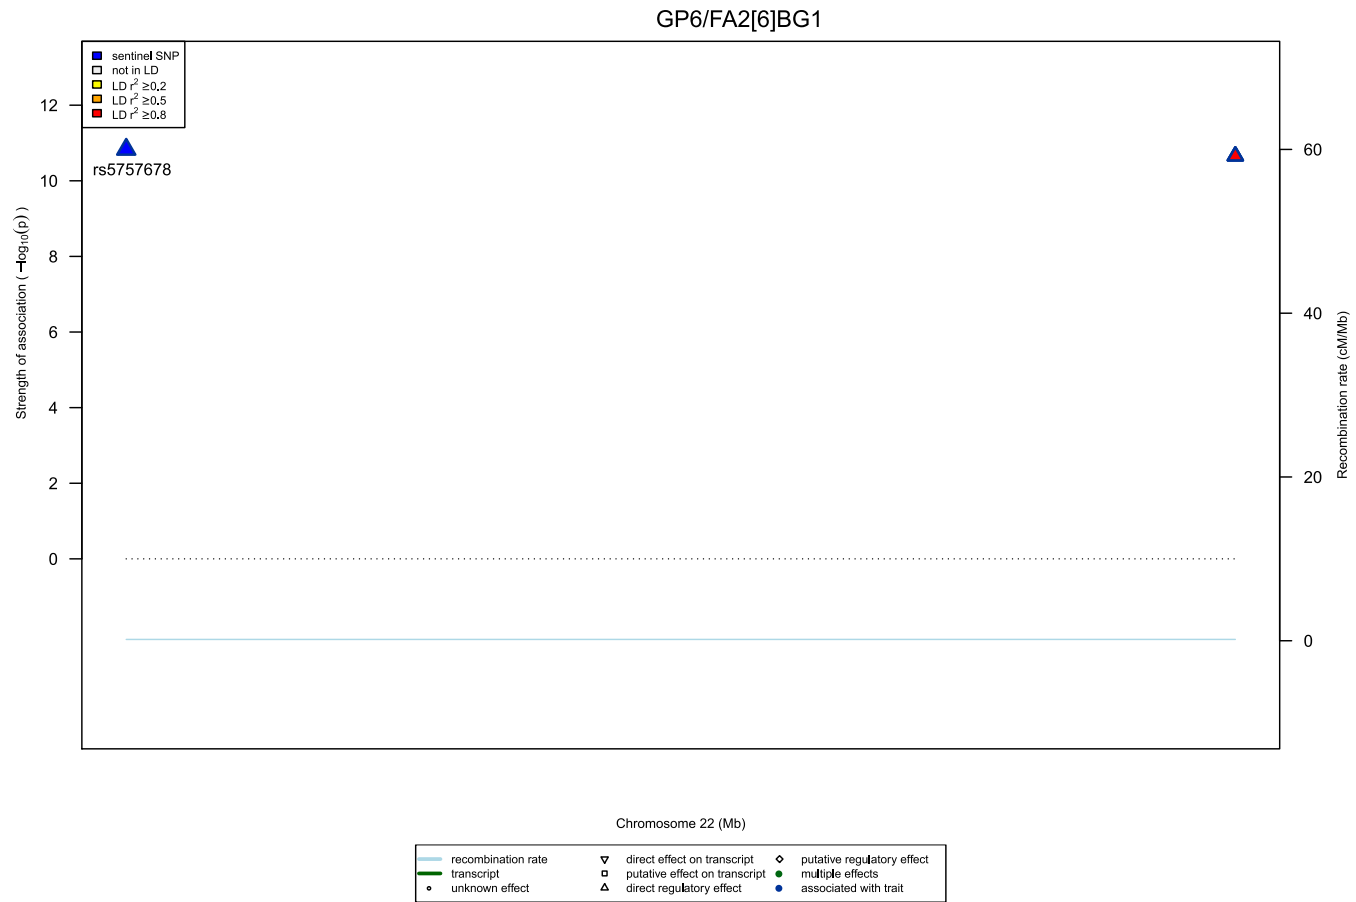

**ESM Fig. 1** Regional association plot for GP6 glycan. Figure was created using SNIQA v3.4 from November 2020, GRCh37.p13, Ensembl version 87, 1000 genomes phase 3 v5, European (Arnold M, Raffler J, Pfeufer A, Suhre K, Kastenmüller G (2015) SNIQA: an interactive, genetic variant-centered annotation browser. *Bioinforma* 31(8):1334–1336). The plot shows the strength of association ( $-\log_{10}(P)$ ), recombination rate, genes, and regulatory elements. The variants' symbols depict the functional annotations, the colors depict the pairwise LD correlations to the sentinel variant

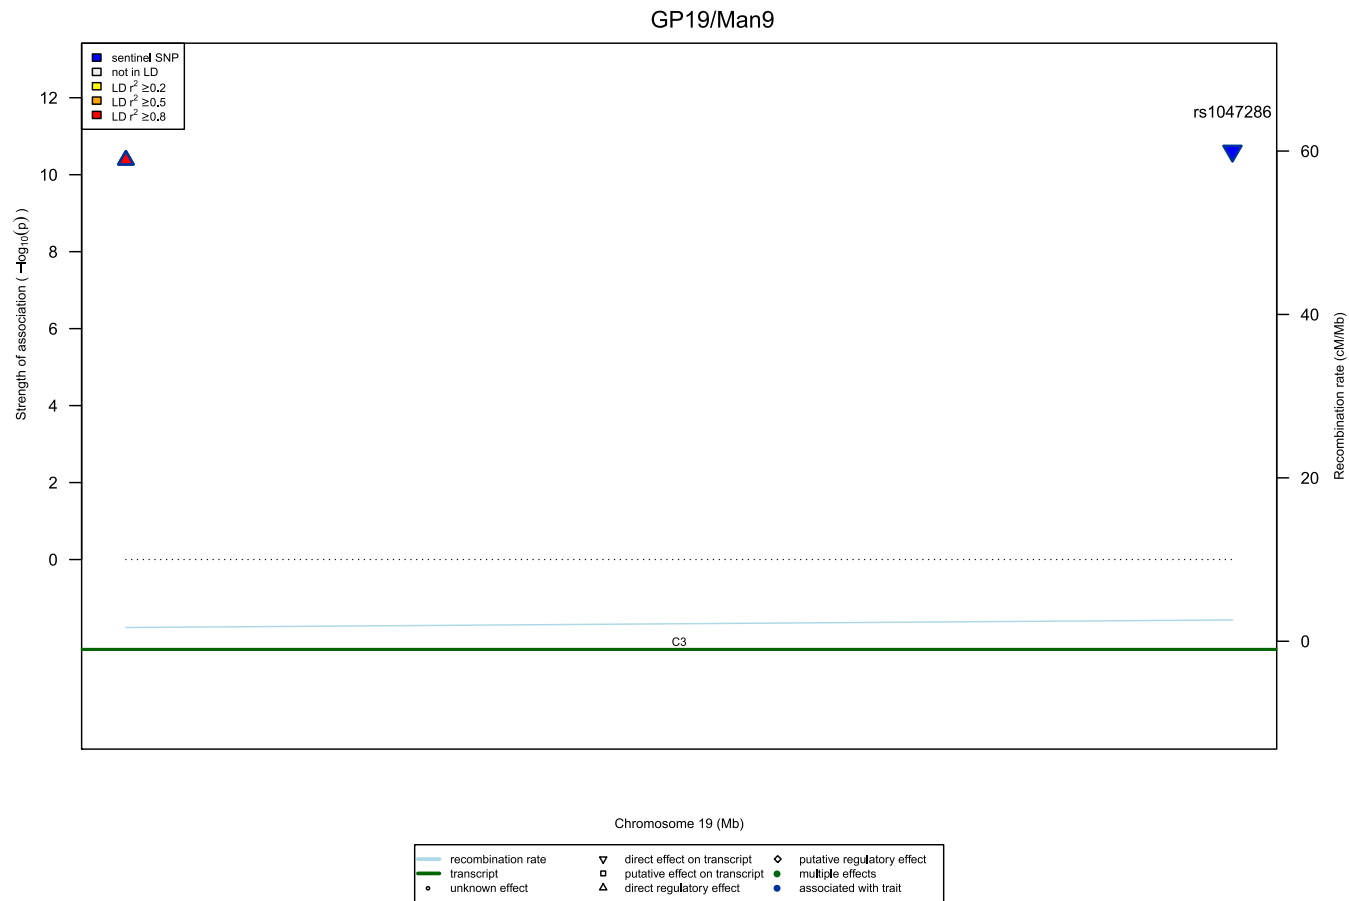

**ESM Fig. 2** Regional association plot for GP19 glycan. Figure was created using SNI PA v3.4 from November 2020, GRCh37.p13, Ensembl version 87, 1000 genomes phase 3 v5, European (Arnold M, Raffler J, Pfeufer A, Suhre K, Kastenmüller G (2015) SNI PA: an interactive, genetic variant-centered annotation browser. *Bioinforma* 31(8):1334–1336). The plot shows the strength of association ( $-\log_{10}(P)$ ), recombination rate, genes, and regulatory elements. The variants' symbols depict the functional annotations, the colors depict the pairwise LD correlations to the sentinel variant. C3, complement C3 gene

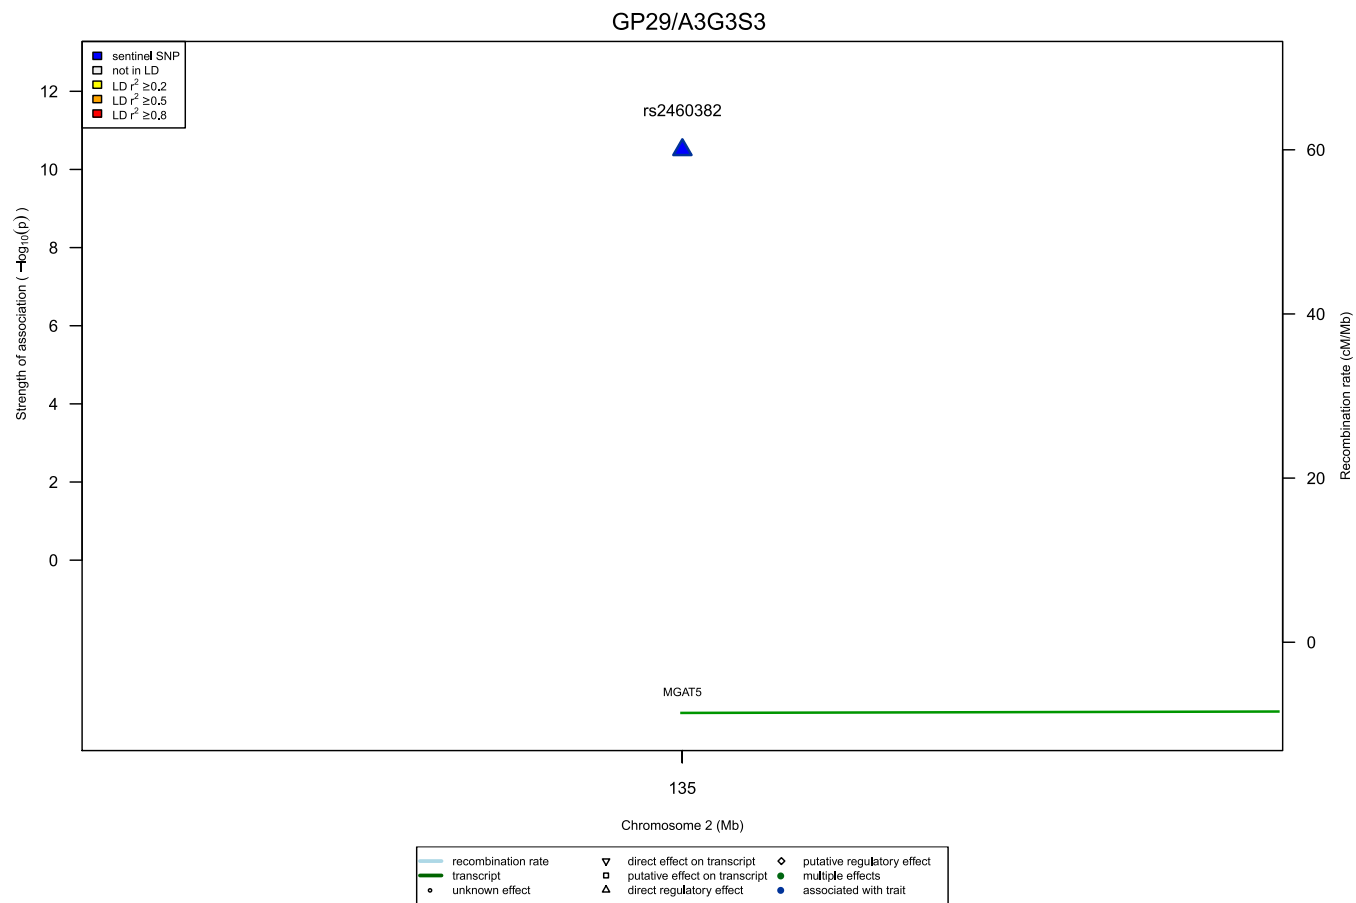

**ESM Fig. 3** Regional association plot for GP29 glycan. Figure was created using SNIpa v3.4 from November 2020, GRCh37.p13, Ensembl version 87, 1000 genomes phase 3 v5, European (Arnold M, Raffler J, Pfeufer A, Suhre K, Kastenmüller G (2015) SNIpa: an interactive, genetic variant-centered annotation browser. *Bioinforma* 31(8):1334–1336). The plot shows the strength of association ( $-\log_{10}(P)$ ), recombination rate, genes, and regulatory elements. The variants' symbols depict the functional annotations, the colors depict the pairwise LD correlations to the sentinel variant. *MGAT5*, alpha-1,6-mannosylglycoprotein 6-beta-*N*-acetylglucosaminyltransferase gene



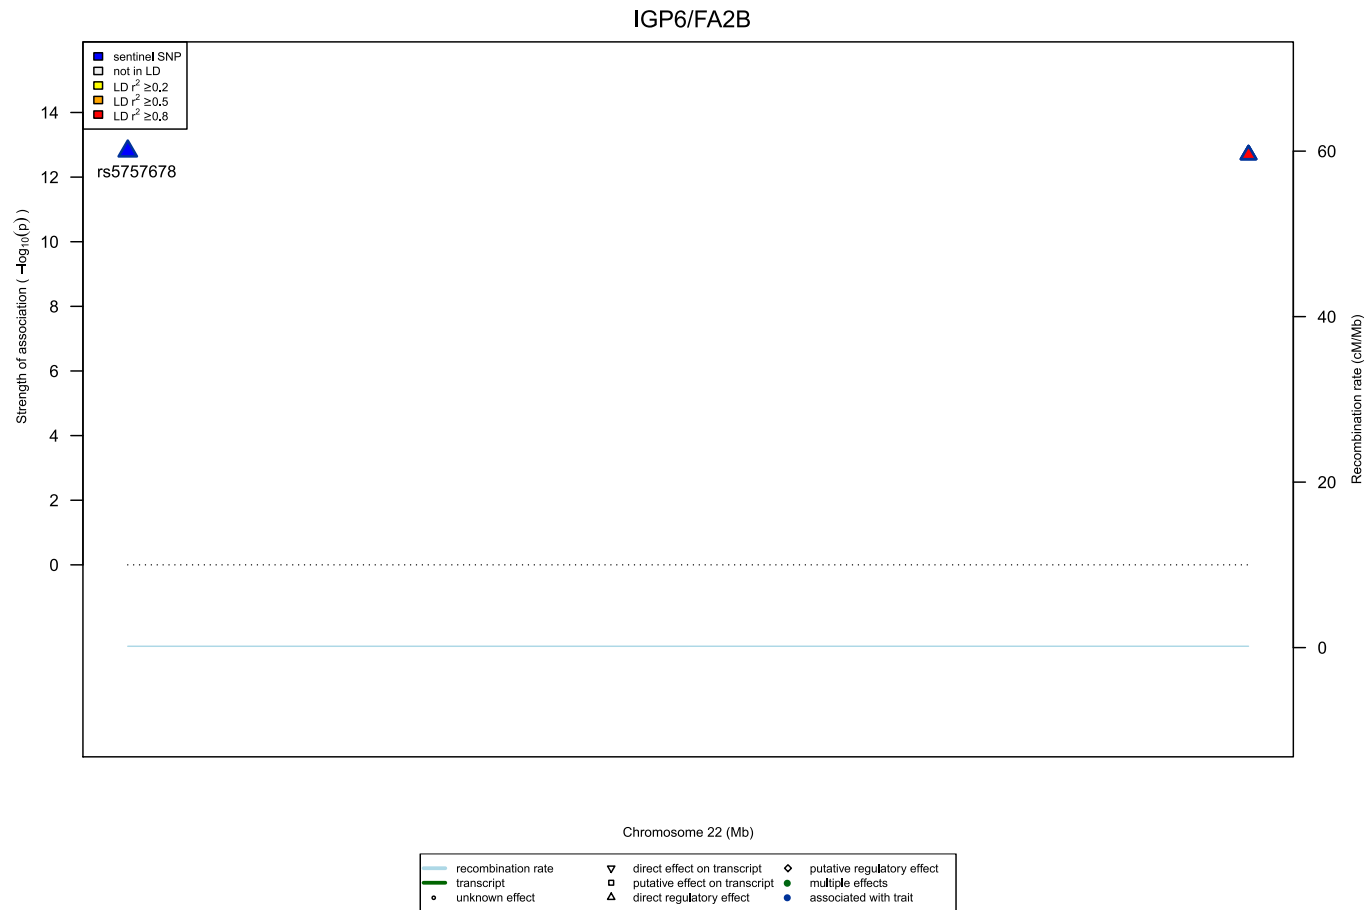

**ESM Fig. 4** Regional association plot for IGP6 glycan. Figure was created using SNIPIA v3.4 from November 2020, GRCh37.p13, Ensembl version 87, 1000 genomes phase 3 v5, European (Arnold M, Raffler J, Pfeufer A, Suhre K, Kastenmüller G (2015) SNIPIA: an interactive, genetic variant-centered annotation browser. *Bioinforma* 31(8):1334–1336). The plot shows the strength of association ( $-\log_{10}(P)$ ), recombination rate, genes, and regulatory elements. The variants' symbols depict the functional annotations, the colors depict the pairwise LD correlations to the sentinel variant

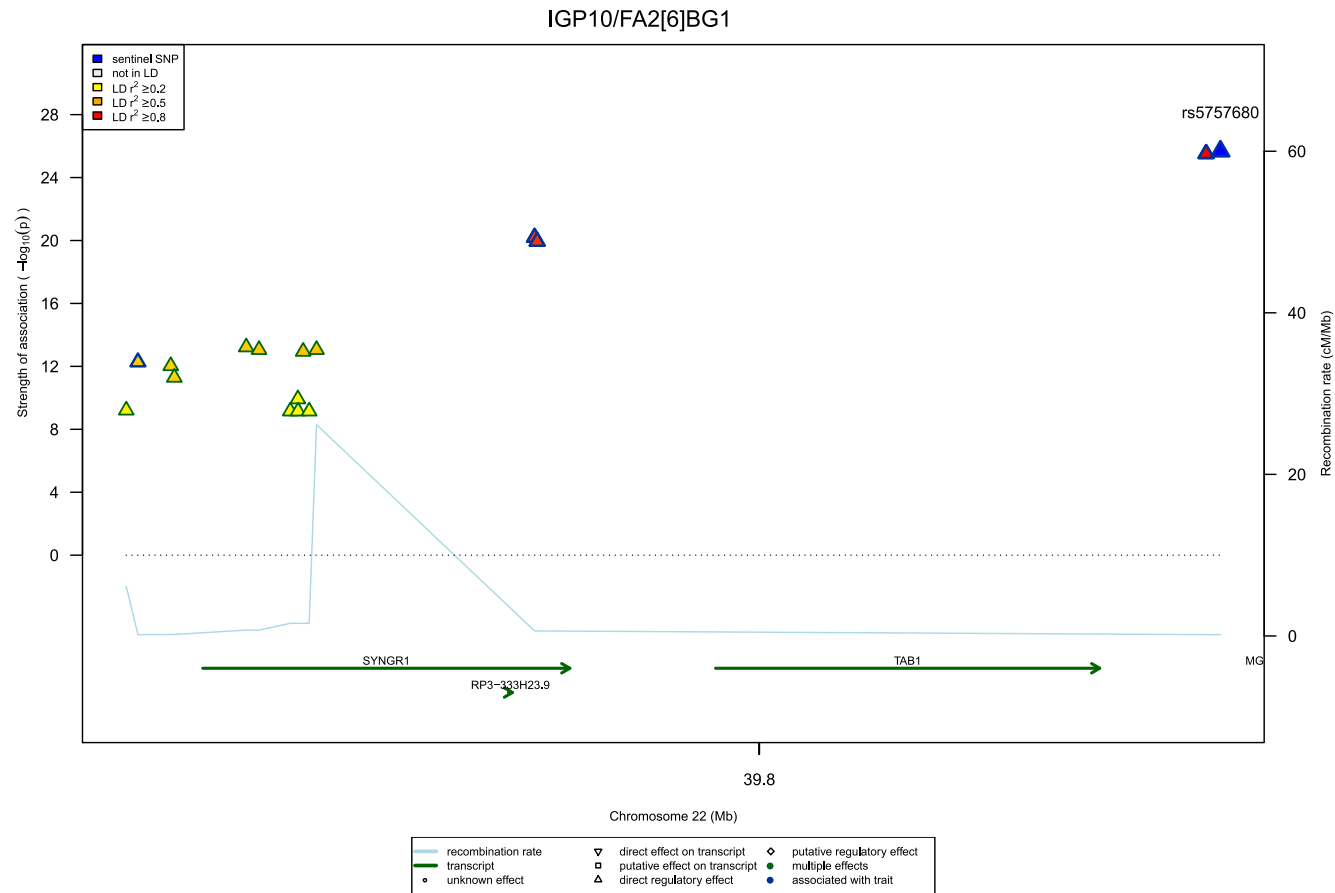

**ESM Fig. 5** Regional association plot for IGP10 glycan. Figure was created using SNIQA v3.4 from November 2020, GRCh37.p13, Ensembl version 87, 1000 genomes phase 3 v5, European (Arnold M, Raffler J, Pfeufer A, Suhre K, Kastenmüller G (2015) SNIQA: an interactive, genetic variant-centered annotation browser. *Bioinforma* 31(8):1334–1336). The plot shows the strength of association ( $-\log_{10}(P)$ ), recombination rate, genes, and regulatory elements. The variants' symbols depict the functional annotations, the colors depict the pairwise LD correlations to the sentinel variant. *SYNGR1*, synaptogyrin 1 gene; *TAB1*, TGF-beta activated kinase 1 (MAP3K7) binding protein 1 gene

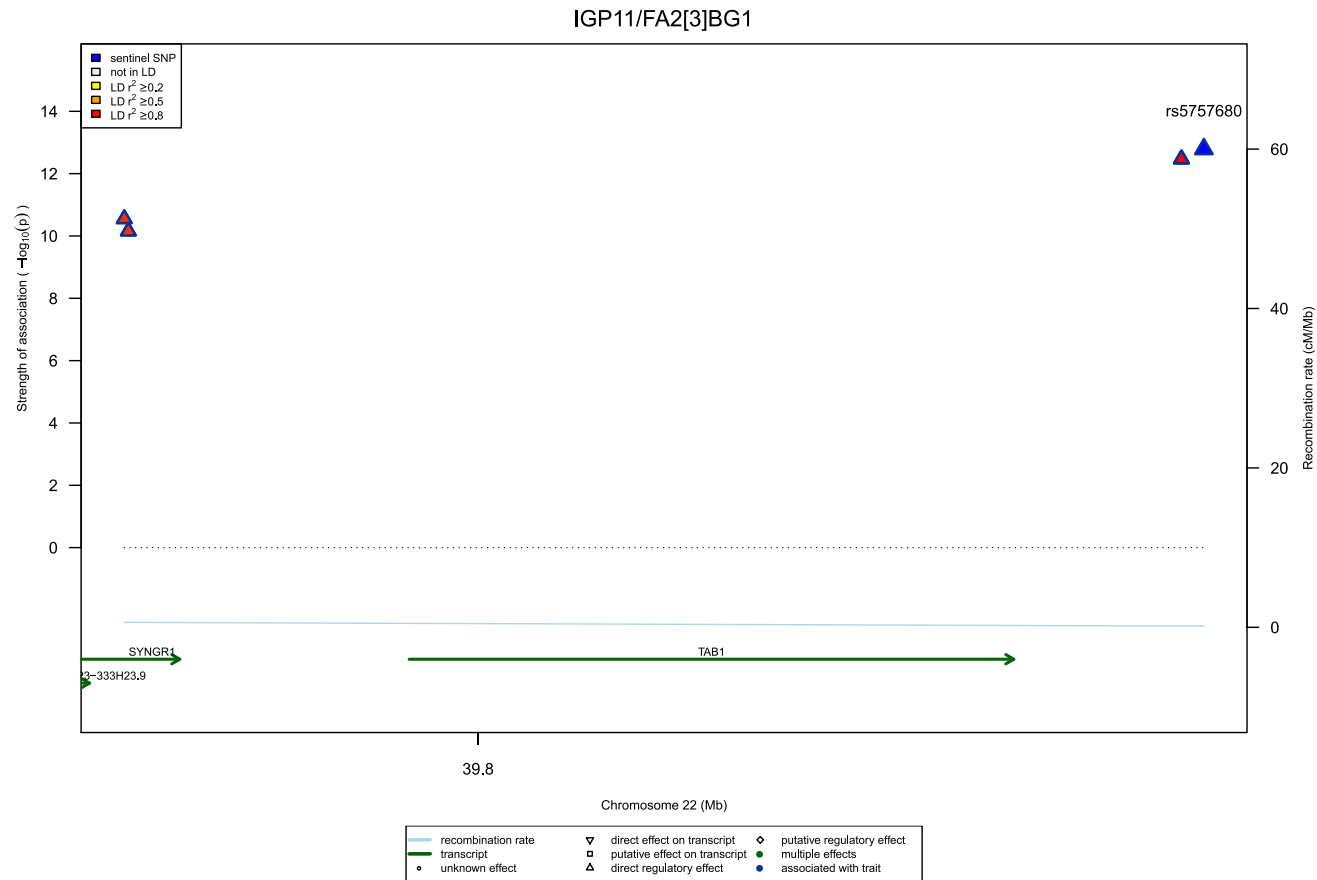

**ESM Fig. 6** Regional association plot for IGP11 glycan. Figure was created using SNIQA v3.4 from November 2020, GRCh37.p13, Ensembl version 87, 1000 genomes phase 3 v5, European (Arnold M, Raffler J, Pfeufer A, Suhre K, Kastenmüller G (2015) SNIQA: an interactive, genetic variant-centered annotation browser. *Bioinforma* 31(8):1334–1336). The plot shows the strength of association ( $-\log_{10}(P)$ ), recombination rate, genes, and regulatory elements. The variants' symbols depict the functional annotations, the colors depict the pairwise LD correlations to the sentinel variant. *SYNGR1*, synaptogyrin 1 gene; *TAB1*, TGF-beta activated kinase 1 (MAP3K7) binding protein 1 gene

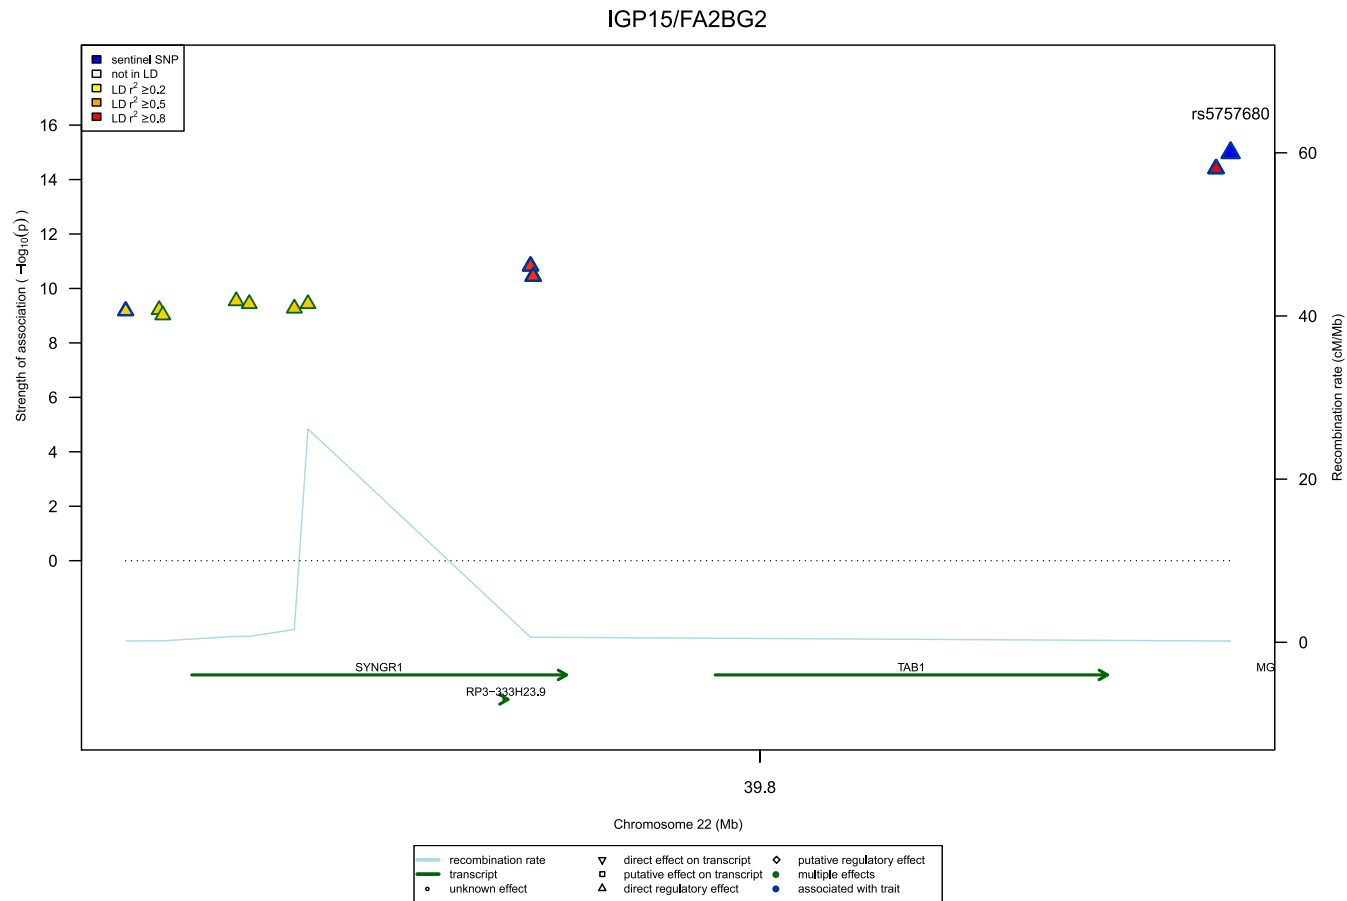

**ESM Fig. 7** Regional association plot for IGP15 glycan. Figure was created using SNIQA v3.4 from November 2020, GRCh37.p13, Ensembl version 87, 1000 genomes phase 3 v5, European (Arnold M, Raffler J, Pfeufer A, Suhre K, Kastenmüller G (2015) SNIQA: an interactive, genetic variant-centered annotation browser. *Bioinforma* 31(8):1334–1336). The plot shows the strength of association ( $-\log_{10}(P)$ ), recombination rate, genes, and regulatory elements. The variants' symbols depict the functional annotations, the colors depict the pairwise LD correlations to the sentinel variant. *SYNGR1*, synaptogyrin 1 gene; *TAB1*, TGF-beta activated kinase 1 (MAP3K7) binding protein 1 gene

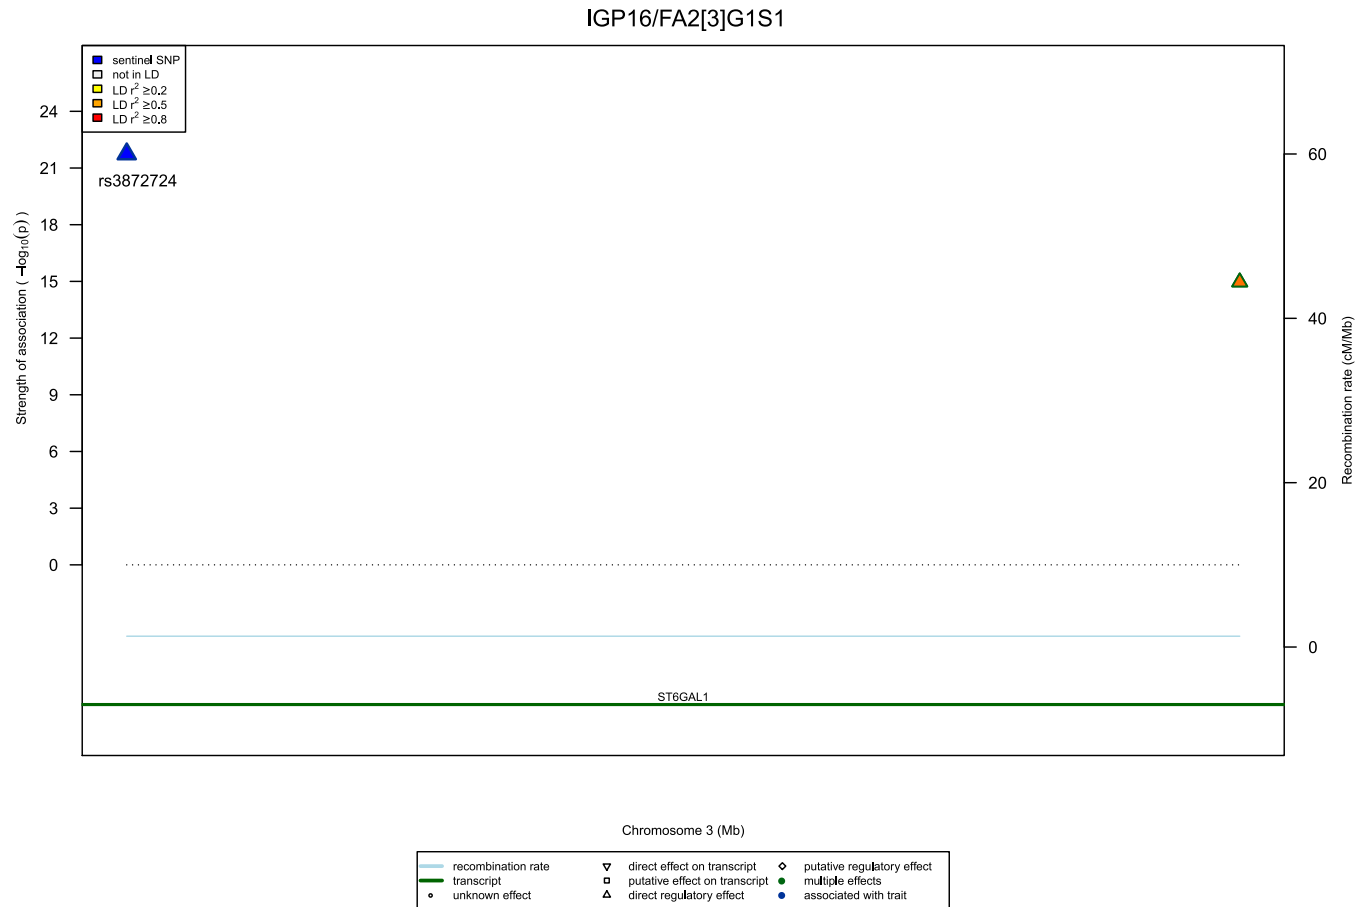

**ESM Fig. 8** Regional association plot for IGP16 glycan. Figure was created using SNI<sub>PA</sub> v3.4 from November 2020, GRCh37.p13, Ensembl version 87, 1000 genomes phase 3 v5, European (Arnold M, Raffler J, Pfeufer A, Suhre K, Kastenmüller G (2015) SNI<sub>PA</sub>: an interactive, genetic variant-centered annotation browser. *Bioinforma* 31(8):1334–1336). The plot shows the strength of association ( $-\log_{10}(P)$ ), recombination rate, genes, and regulatory elements. The variants' symbols depict the functional annotations, the colors depict the pairwise LD correlations to the sentinel variant. *ST6GAL1*, ST6 beta-galactoside alpha-2,6-sialyltransferase 1 gene

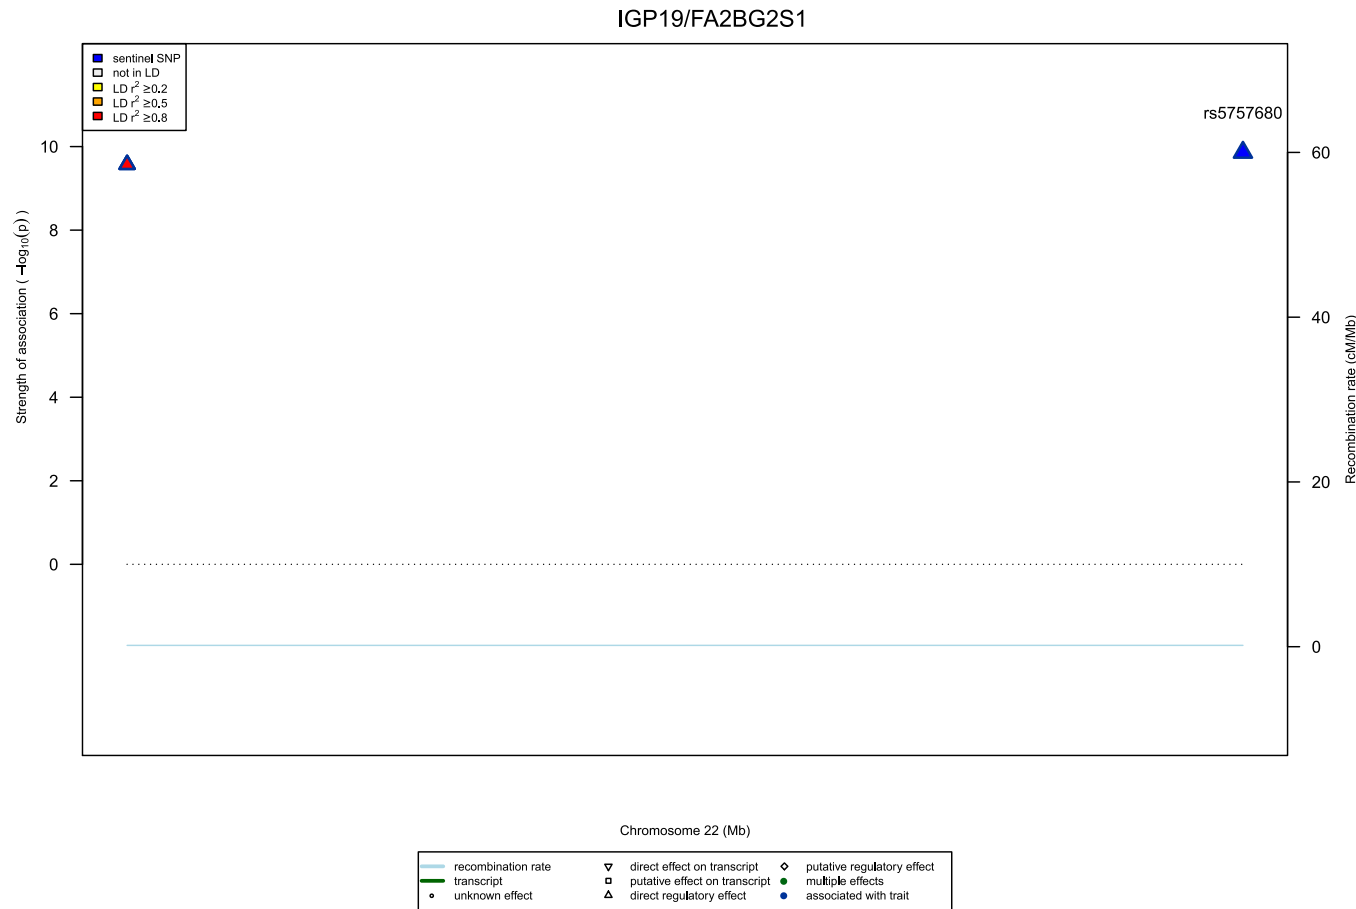

**ESM Fig. 9** Regional association plot for IGP19 glycan. Figure was created using SNI<sub>PA</sub> v3.4 from November 2020, GRCh37.p13, Ensembl version 87, 1000 genomes phase 3 v5, European (Arnold M, Raffler J, Pfeufer A, Suhre K, Kastenmüller G (2015) SNI<sub>PA</sub>: an interactive, genetic variant-centered annotation browser. *Bioinforma* 31(8):1334–1336). The plot shows the strength of association ( $-\log_{10}(P)$ ), recombination rate, genes, and regulatory elements. The variants' symbols depict the functional annotations, the colors depict the pairwise LD correlations to the sentinel variant

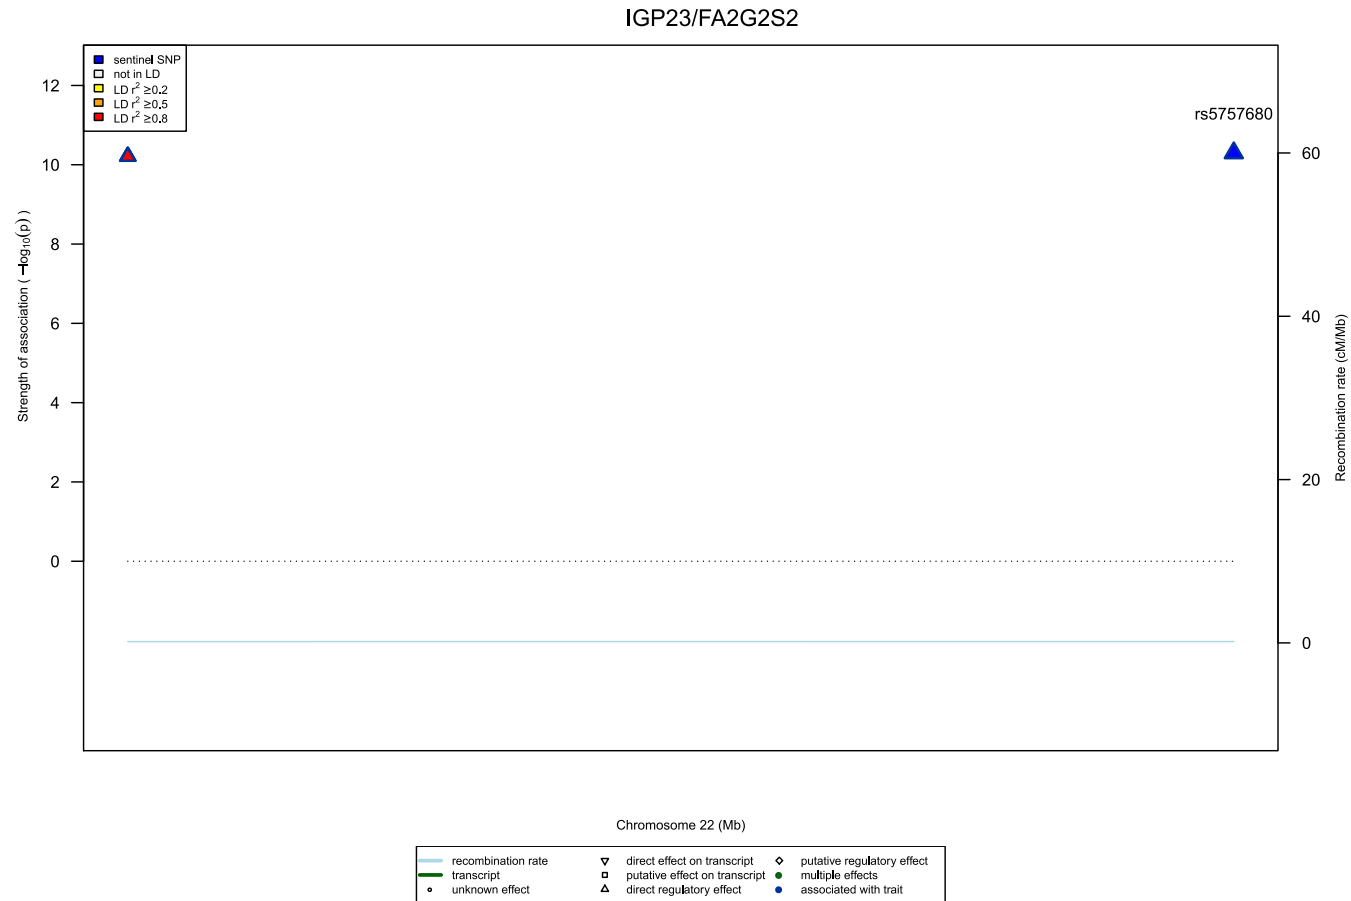

**ESM Fig. 10** Regional association plot for IGP23 glycan. Figure was created using SNIpA v3.4 from November 2020, GRCh37.p13, Ensembl version 87, 1000 genomes phase 3 v5, European (Arnold M, Raffler J, Pfeufer A, Suhre K, Kastenmüller G (2015) SNIpA: an interactive, genetic variant-centered annotation browser. *Bioinforma* 31(8):1334–1336). The plot shows the strength of association ( $-\log_{10}(P)$ ), recombination rate, genes, and regulatory elements. The variants' symbols depict the functional annotations, the colors depict the pairwise LD correlations to the sentinel variant

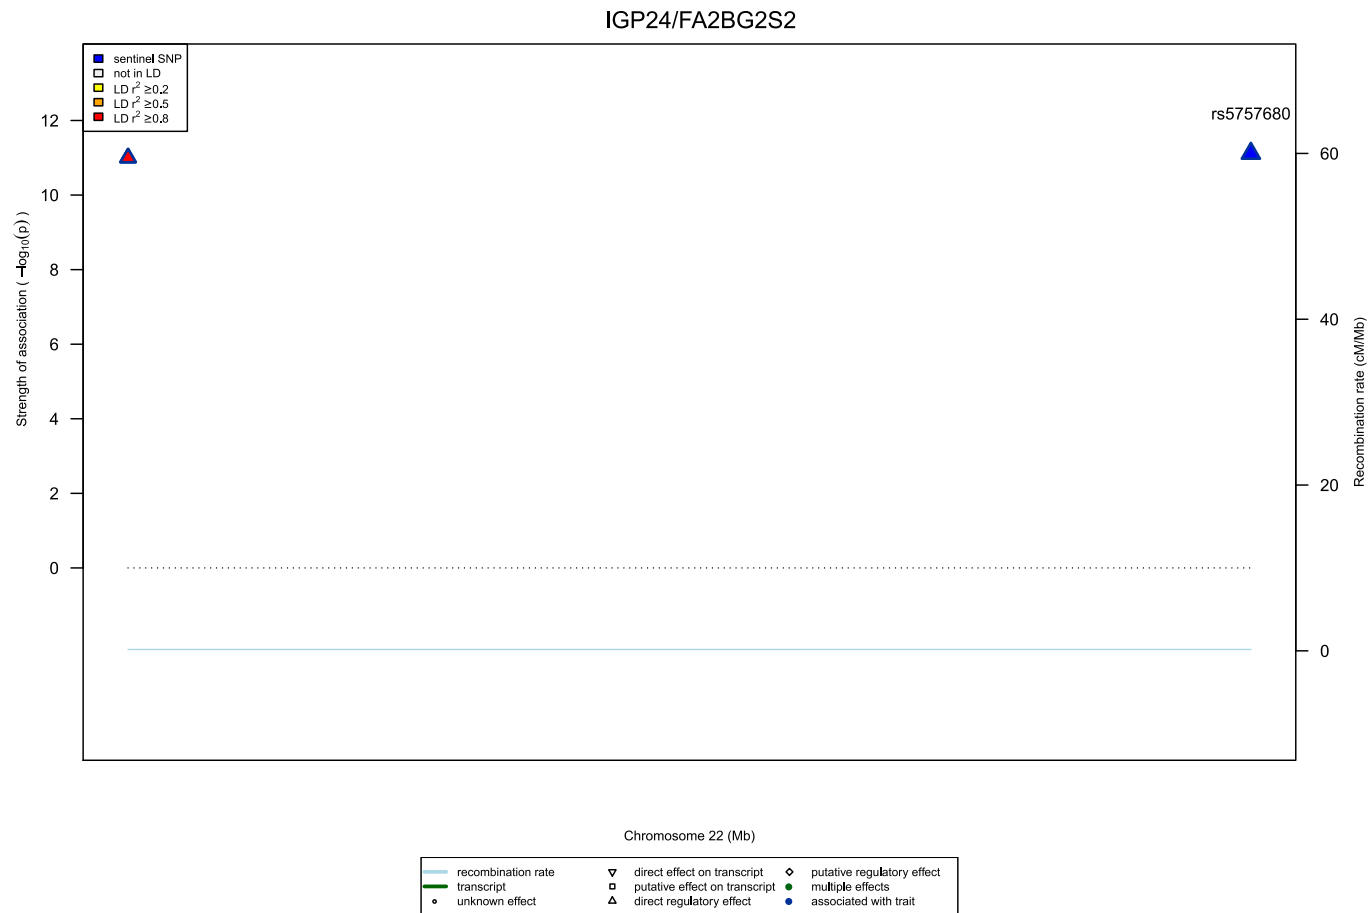

**ESM Fig. 11** Regional association plot for IGP24 glycan. Figure was created using SNIIPA v3.4 from November 2020, GRCh37.p13, Ensembl version 87, 1000 genomes phase 3 v5, European (Arnold M, Raffler J, Pfeufer A, Suhre K, Kastenmüller G (2015) SNIIPA: an interactive, genetic variant-centered annotation browser. *Bioinforma* 31(8):1334–1336). The plot shows the strength of association ( $-\log_{10}(P)$ ), recombination rate, genes, and regulatory elements. The variants' symbols depict the functional annotations, the colors depict the pairwise LD correlations to the sentinel variant
